# Supplementary material for: Optimized microwave assisted extraction (MAE) of alkaloids and polyphenols from Berberis roots using multiple-component analysis
Source: PubMed Central journal article supplement (PMC6976575; doi:10.1038/s41598-020-57585-8), 2020-01-22
Supplement: 41598_2020_57585_MOESM1_ESM.pdf [file 41598_2020_57585_MOESM1_ESM.pdf]

**Optimized microwave assisted extraction (MAE) of alkaloids and polyphenols from Berberis roots using multiple-component analysis**

**Tarun Belwal<sup>1\*</sup>, Aseesh Pandey<sup>1,2\*</sup>, Indra D Bhatt<sup>1\*</sup>, Ranbeer S Rawal<sup>1</sup>**

<sup>1</sup>*G.B. Pant National Institute of Himalayan Environment and Sustainable Development,  
Kosi Katarmal, Almora- 263643, Uttarakhand, India*

<sup>2</sup>*G.B. Pant National Institute of Himalayan Environment and Sustainable Development,  
Sikkim Regional Centre, Pangthang, Gangtok-737101, Sikkim, India*

---

\*Corresponding author. E-mail addresses: draseeshpandey@gmail.com (A.P), tarungbpihed@gmail.com (T.B), bhattid4@gmail.com (I.D.B)

**Supplementary Table 1:** Plackett-Burman design (PBD) for estimation of berberine, palmatine and total phenols (TP) as responses under MAE.

| Run                  | Factors        |                |                |                |                | Responses                          |                                    |                                 |
|----------------------|----------------|----------------|----------------|----------------|----------------|------------------------------------|------------------------------------|---------------------------------|
|                      | X <sub>1</sub> | X <sub>2</sub> | X <sub>3</sub> | X <sub>4</sub> | X <sub>5</sub> | Berberine<br>(mg g <sup>-1</sup> ) | Palmatine<br>(mg g <sup>-1</sup> ) | TP<br>(mg GAE g <sup>-1</sup> ) |
| 1                    | 300 (+1)       | 5 (+1)         | 50 (+1)        | 2.5 (-1)       | 20 (-1)        | 18.82                              | 8.99                               | 9.94                            |
| 2                    | 300 (+1)       | 2 (-1)         | 50 (+1)        | 6.0 (+1)       | 20 (-1)        | 7.89                               | 7.18                               | 8.78                            |
| 3                    | 300 (+1)       | 2 (-1)         | 20 (-1)        | 2.5 (-1)       | 80 (+1)        | 35.82                              | 7.37                               | 5.91                            |
| 4                    | 300 (+1)       | 5 (+1)         | 20 (-1)        | 2.5 (-1)       | 20 (-1)        | 16.28                              | 4.99                               | 4.73                            |
| 5                    | 100 (-1)       | 5 (+1)         | 50 (+1)        | 6.0 (+1)       | 20 (-1)        | 5.31                               | 6.60                               | 7.47                            |
| 6                    | 100 (-1)       | 2 (-1)         | 20 (-1)        | 6.0 (+1)       | 20 (-1)        | 7.23                               | 3.66                               | 3.92                            |
| 7                    | 300 (+1)       | 2 (-1)         | 50 (+1)        | 6.0 (+1)       | 80 (+1)        | 21.75                              | 9.01                               | 8.67                            |
| 8                    | 300 (+1)       | 5 (+1)         | 20 (-1)        | 6.0 (+1)       | 80 (+1)        | 20.09                              | 5.29                               | 4.58                            |
| 9                    | 100 (-1)       | 2 (-1)         | 50 (+1)        | 2.5 (-1)       | 80 (+1)        | 25.14                              | 9.64                               | 8.90                            |
| 10                   | 100 (-1)       | 2 (-1)         | 20 (-1)        | 2.5 (-1)       | 20 (-1)        | 13.54                              | 4.48                               | 3.97                            |
| 11                   | 100 (-1)       | 5 (+1)         | 20 (-1)        | 6.0 (+1)       | 80 (+1)        | 17.53                              | 5.02                               | 3.99                            |
| 12                   | 100 (-1)       | 5 (+1)         | 50 (+1)        | 2.5 (-1)       | 80 (+1)        | 18.89                              | 8.53                               | 7.28                            |
| $\beta$ Berberine    | 2.75*          | - 1.21         | - 1.06         | - 4.06**       | 5.85***        |                                    |                                    |                                 |
| $\beta$ Palmatine    | 0.41*          | - 0.16         | 1.59***        | - 0.60**       | 0.75**         |                                    |                                    |                                 |
| $\beta$ TP           | 0.59*          | - 0.18         | 2.00***        | - 0.28         | 0.04           |                                    |                                    |                                 |
| <i>Model</i>         |                |                |                |                |                |                                    |                                    |                                 |
| <i>F- value</i>      |                |                |                |                |                | 15.48**                            | 41.78***                           | 27.77***                        |
| <i>R<sup>2</sup></i> |                |                |                |                |                | 0.92                               | 0.97                               | 0.95                            |

X<sub>1</sub> = microwave power (W), X<sub>2</sub> = irradiation time (min), X<sub>3</sub> = sample to solvent ratio (g/ml), X<sub>4</sub> = solvent pH, X<sub>5</sub> = solvent concentration (%), TP = total phenols,  $\beta$  = regression coefficient,  $R^2$  = coefficient of determination; Level of significance \* p<0.05, \*\* p<0.01, \*\*\* p<0.001

**Supplementary Table 2:** Central Composite Design (CCD) model with responses as alkaloids, polyphenolics and antioxidant activities for different levels of independent variables.

| Run | Independent variables |                |                |                | Berberine<br>(mg g <sup>-1</sup> ) | Palmatine<br>(mg g <sup>-1</sup> ) | Dependent variables (Response) |      |      |      |
|-----|-----------------------|----------------|----------------|----------------|------------------------------------|------------------------------------|--------------------------------|------|------|------|
|     | X <sub>1</sub>        | X <sub>2</sub> | X <sub>3</sub> | X <sub>4</sub> |                                    |                                    | TP                             | DPPH | ABTS | FRAP |
| 1   | 200 (-1)              | 30 (-1)        | 5.0 (+1)       | 100 (+1)       | 25                                 | 10                                 | 11                             | 23   | 11   | 151  |
| 2   | 600 (+1)              | 50 (0)         | 3.5 (0)        | 70 (0)         | 14                                 | 8                                  | 18                             | 39   | 17   | 170  |
| 3   | 600 (+1)              | 70 (+1)        | 2.0 (-1)       | 40 (-1)        | 30                                 | 11                                 | 15                             | 40   | 10   | 150  |
| 4   | 600 (+1)              | 30 (-1)        | 5.0 (+1)       | 40 (-1)        | 9                                  | 5                                  | 10                             | 23   | 9    | 116  |
| 5   | 400 (0)               | 50 (0)         | 2.0 (-1)       | 70 (0)         | 20                                 | 9                                  | 16                             | 33   | 10   | 170  |
| 6   | 400 (0)               | 50 (0)         | 3.5 (0)        | 100 (+1)       | 26                                 | 10                                 | 11                             | 35   | 13   | 159  |
| 7   | 600 (+1)              | 30 (-1)        | 5.0 (+1)       | 100 (+1)       | 12                                 | 5                                  | 11                             | 24   | 12   | 204  |
| 8   | 600 (+1)              | 70 (+1)        | 2.0 (-1)       | 100 (+1)       | 50                                 | 25                                 | 21                             | 55   | 23   | 230  |
| 9   | 600 (+1)              | 30 (-1)        | 2.0 (-1)       | 100 (+1)       | 16                                 | 6                                  | 14                             | 24   | 13   | 225  |
| 10  | 400 (0)               | 50 (0)         | 3.5 (0)        | 70 (0)         | 17                                 | 9                                  | 13                             | 35   | 12   | 135  |
| 11  | 400 (0)               | 50 (0)         | 5.0 (+1)       | 70 (0)         | 17                                 | 9                                  | 12                             | 33   | 10   | 144  |
| 12  | 600 (+1)              | 30 (-1)        | 2.0 (-1)       | 40 (-1)        | 15                                 | 7                                  | 13                             | 20   | 10   | 162  |
| 13  | 600 (+1)              | 70 (+1)        | 5.0 (+1)       | 40 (-1)        | 15                                 | 10                                 | 14                             | 40   | 9    | 100  |
| 14  | 400 (0)               | 50 (0)         | 3.5 (0)        | 70 (0)         | 17                                 | 8                                  | 12                             | 35   | 13   | 136  |
| 15  | 600 (+1)              | 70 (+1)        | 5.0 (+1)       | 100 (+1)       | 34                                 | 15                                 | 16                             | 51   | 18   | 215  |
| 16  | 400 (0)               | 30 (-1)        | 3.5 (0)        | 70 (0)         | 15                                 | 7                                  | 10                             | 24   | 11   | 128  |
| 17  | 400 (0)               | 50 (0)         | 3.5 (0)        | 70 (0)         | 18                                 | 9                                  | 12                             | 35   | 13   | 134  |
| 18  | 200 (-1)              | 70 (+1)        | 5.0 (+1)       | 40 (-1)        | 13                                 | 9                                  | 13                             | 36   | 6    | 102  |
| 19  | 400 (0)               | 50 (0)         | 3.5 (0)        | 70 (0)         | 18                                 | 9                                  | 14                             | 36   | 12   | 134  |
| 20  | 200 (-1)              | 70 (+1)        | 5.0 (+1)       | 100 (+1)       | 36                                 | 12                                 | 18                             | 43   | 13   | 165  |
| 21  | 200 (-1)              | 30 (-1)        | 2.0 (-1)       | 40 (-1)        | 14                                 | 6                                  | 13                             | 19   | 9    | 131  |
| 22  | 200 (-1)              | 70 (+1)        | 2.0 (-1)       | 40 (-1)        | 17                                 | 10                                 | 14                             | 36   | 6    | 114  |
| 23  | 400 (0)               | 50 (0)         | 3.5 (0)        | 70 (0)         | 17                                 | 8                                  | 13                             | 34   | 12   | 137  |
| 24  | 400 (0)               | 50 (0)         | 3.5 (0)        | 70 (0)         | 17                                 | 8                                  | 13                             | 36   | 11   | 133  |
| 25  | 200 (-1)              | 30 (-1)        | 5.0 (+1)       | 40 (-1)        | 20                                 | 5                                  | 18                             | 21   | 9    | 116  |
| 26  | 200 (-1)              | 70 (+1)        | 2.0 (-1)       | 100 (+1)       | 41                                 | 16                                 | 16                             | 44   | 14   | 144  |
| 27  | 400 (0)               | 70 (+1)        | 3.5 (0)        | 70 (0)         | 25                                 | 11                                 | 14                             | 41   | 11   | 120  |
| 28  | 200 (-1)              | 50 (0)         | 3.5 (0)        | 70 (0)         | 17                                 | 8                                  | 14                             | 32   | 10   | 123  |
| 29  | 400 (0)               | 50 (0)         | 3.5 (0)        | 40 (-1)        | 16                                 | 8                                  | 12                             | 32   | 10   | 101  |
| 30  | 200 (-1)              | 30 (-1)        | 2.0 (-1)       | 100 (+1)       | 22                                 | 8                                  | 9                              | 22   | 8    | 130  |

X<sub>1</sub> = microwave power (W), X<sub>2</sub> = sample to solvent ratio (g ml<sup>-1</sup>), X<sub>3</sub> = solvent pH, X<sub>4</sub> = solvent concentration (%), TP = total phenols (mg GAE g<sup>-1</sup>), DPPH = 2,2-diphenyl-1-picrylhydrazyl radical scavenging ability (mM AAE g<sup>-1</sup>), ABTS = 2,2'- azino-bis (3-ethylbenzothiazoline-6-sulphonic acid) radical cation inhibition (mM AAE g<sup>-1</sup>), FRAP = Ferric reducing antioxidant power (mM AAE g<sup>-1</sup>)

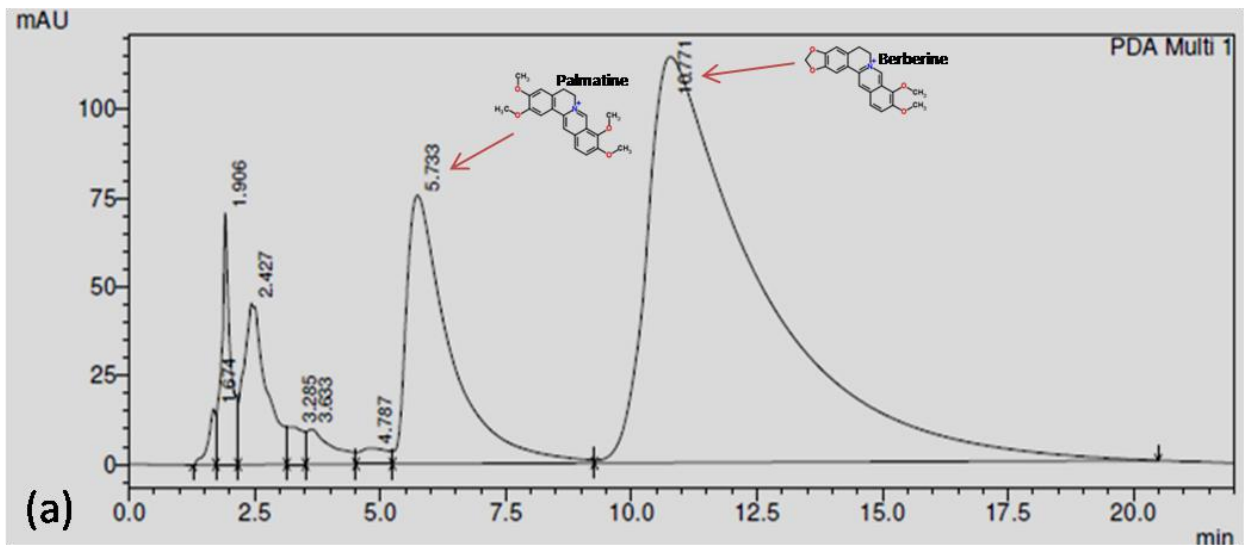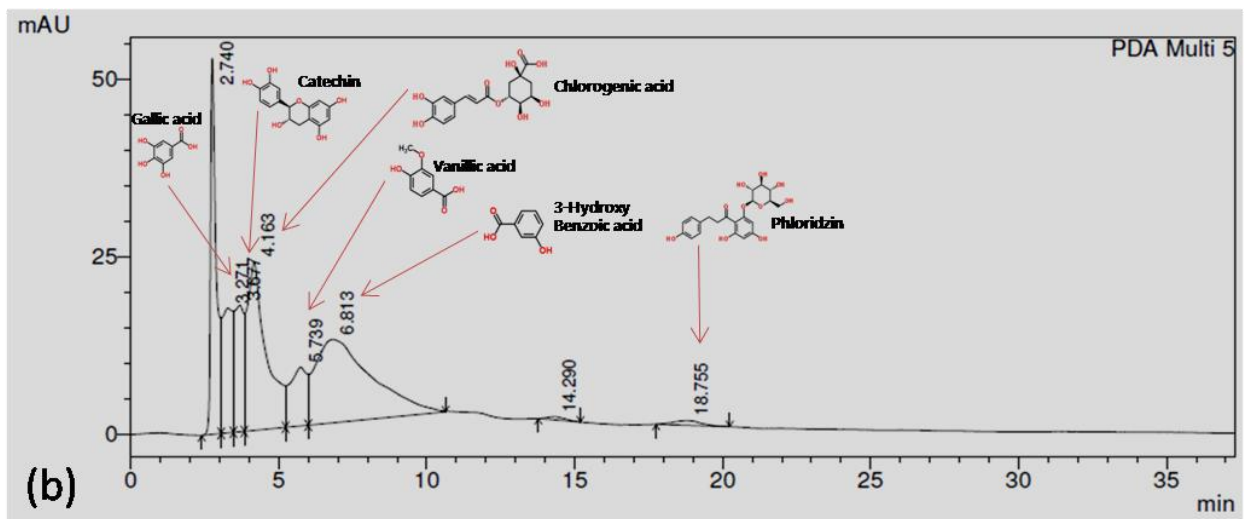

Supplementary Figure 1: Chromatograms of alkaloids and polyphenolic antioxidants in Berberis roots
